# Supplementary material for: Epitaxial synthesis of ultrathin β-In2Se3/MoS2 heterostructures with high visible/near-infrared photoresponse
Source: Royal Society of Chemistry journal article supplement (doi:10.1039/c9nr10387b), 2020-01-01
Supplement: c9nr10387b1.pdf [file c9nr10387b1.pdf]

Electronic Supplementary Information

## **Epitaxial synthesis of ultrathin $\beta$ -In<sub>2</sub>Se<sub>3</sub>/MoS<sub>2</sub> heterostructures with high visible/near-infrared photoresponse**

Zixing Zou<sup>‡a</sup>, Dong Li<sup>‡a</sup>, Junwu Liang<sup>b</sup>, Xuehong Zhang<sup>a</sup>, Huawei Liu<sup>a</sup>, Chenguang Zhu<sup>a</sup>, Xin Yang<sup>a</sup>, Lihui Li<sup>a</sup>, Biyuan Zheng<sup>a</sup>, Xingxia Sun<sup>a</sup>, Zhouxiaosong Zeng<sup>a</sup>, Jiali Yi<sup>a</sup>, Xiujuan Zhuang<sup>a</sup>, Xiao Wang<sup>a</sup>, and Anlian Pan<sup>\*a</sup>

<sup>a</sup>Key Laboratory for Micro-Nano Physics and Technology of Hunan Province, College of Materials Science and Engineering, School of Physics and Electronics, and State Key Laboratory of Chemo/Biosensing and Chemometrics, Hunan University, Changsha, Hunan 410082, P. R. China

<sup>b</sup>School Physics and Telecommunication Engineering, Yulin Normal university, Yulin, Guangxi 537000, P. R. China

\*Corresponding authors: anlian.pan@hnu.edu.cn

‡These authors contributed equally to this study.

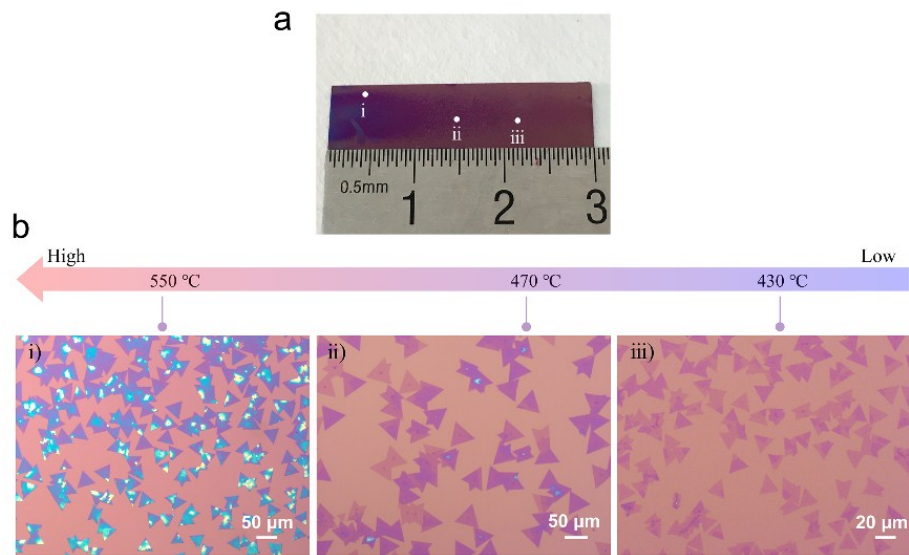

**Fig.S1** Temperature dependent growth behavior of  $\text{In}_2\text{Se}_3/\text{MoS}_2$  heterostructures. (a) Low magnification image of the achieved  $\text{In}_2\text{Se}_3/\text{MoS}_2$  heterostructures on  $\text{SiO}_2/\text{Si}$  substrate. (b) The magnified morphology images of  $\text{In}_2\text{Se}_3/\text{MoS}_2$  heterostructures acquired from i, ii, iii positions in (a), where the temperatures measured at three positions are 550 °C, 470 °C and 430 °C, respectively.

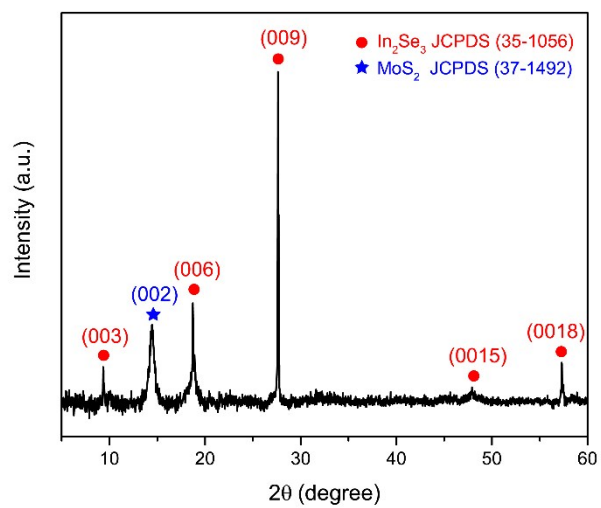

**Fig.S2** X-ray diffraction (XRD) spectrum of  $\text{In}_2\text{Se}_3/\text{MoS}_2$  heterostructures. The peak positions can be indexed to  $\beta$ - $\text{In}_2\text{Se}_3$  (JCPDS 35-1056) and  $\text{MoS}_2$  (JCPDS 37-1492), respectively. Such result confirms the high crystal quality and phase purity of the achieved samples.

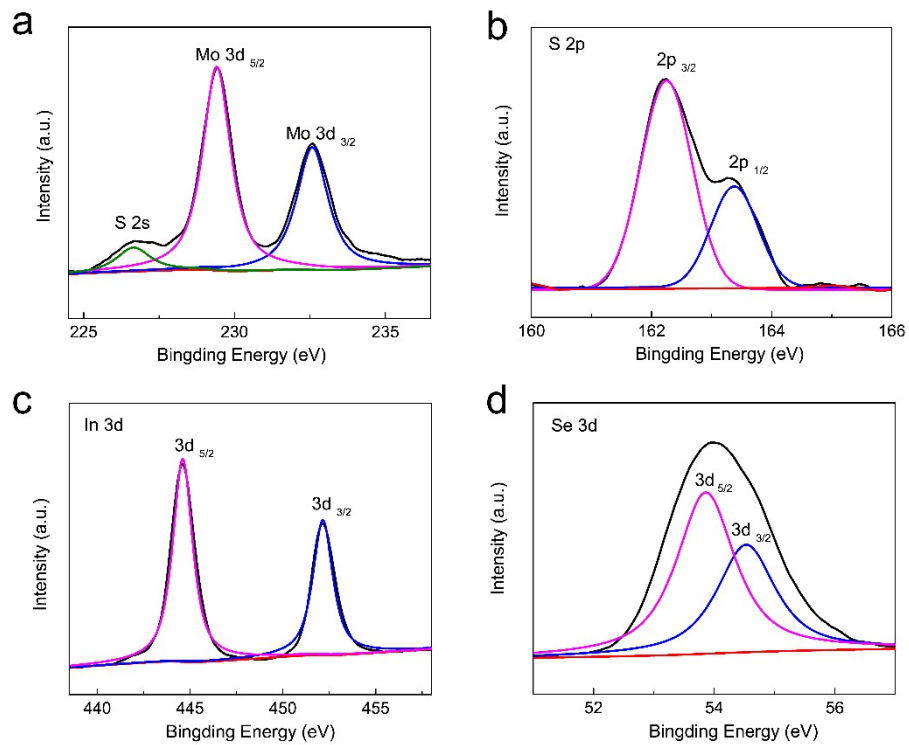

**Fig. S3** X-ray photoelectron spectroscopy (XPS) of  $\text{In}_2\text{Se}_3/\text{MoS}_2$  heterostructures. (a) The binding energies for Mo  $3d_{5/2}$  and Mo  $3d_{3/2}$  are located at 229.4 eV and 232.5 eV, respectively. (b) The binding energies for S  $2p_{3/2}$  and S  $2p_{1/2}$  are located at 162.2 eV and 163.4 eV, corresponding well with the value of  $\text{MoS}_2$ . (c) The spectrums of In  $3d_{5/2}$  and In  $3d_{3/2}$  are located at 445.6 eV and 452.1 eV respectively. (d) The peaks at 53.8 eV and 54.6 eV belong to Se  $3d_{5/2}$  and Se  $3d_{3/2}$ , which can be assigned to the previous reported value of  $\text{In}_2\text{Se}_3$ . According to the above results, we confirm that the heterostructures have formed by pure constituents without alloying.

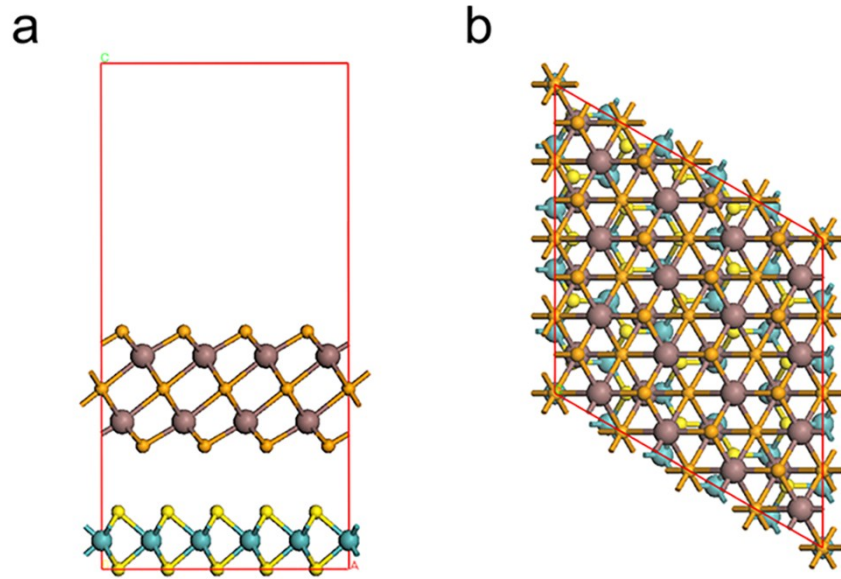

**Fig.S4** Atomic structure of  $\text{In}_2\text{Se}_3/\text{MoS}_2$  heterostructure supercell with side (a) and top (b) views. Single layer  $\text{In}_2\text{Se}_3$  possesses a quintuple layer (QLs) structure, where the Se–In–Se–In–Se atomic sheets are held together by strong in-plane covalent bond.

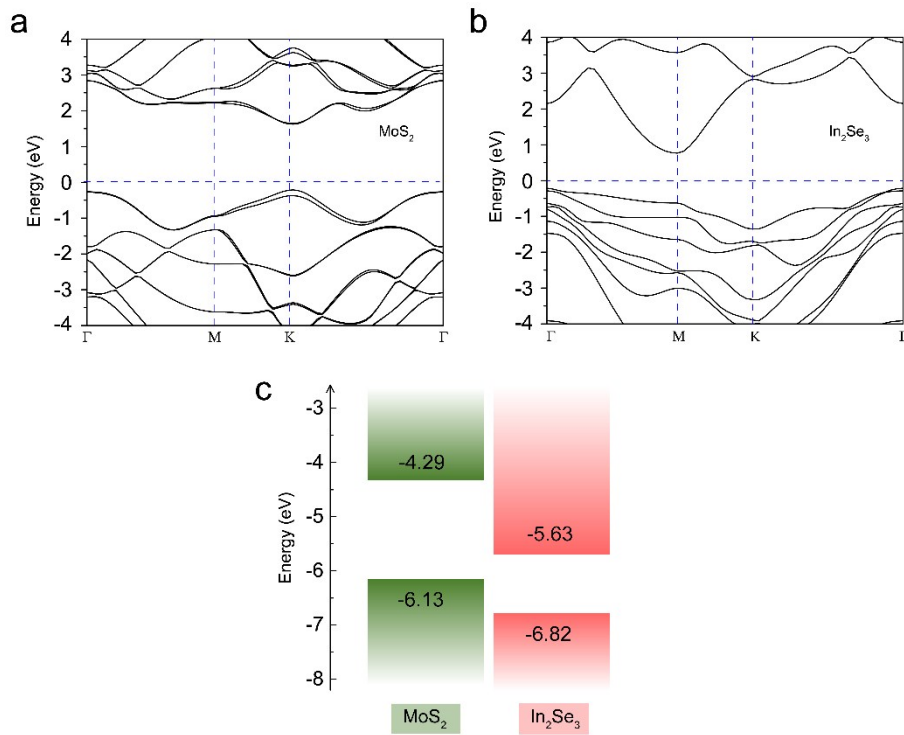

**Fig.S5** Electronic band structure of (a)  $\text{In}_2\text{Se}_3$  and (b)  $\text{MoS}_2$ . As can be seen, monolayer  $\text{MoS}_2$  has direct bandgap while monolayer  $\text{In}_2\text{Se}_3$  possesses indirect bandgap. (c) Band alignment of the  $\text{In}_2\text{Se}_3/\text{MoS}_2$  heterostructure.

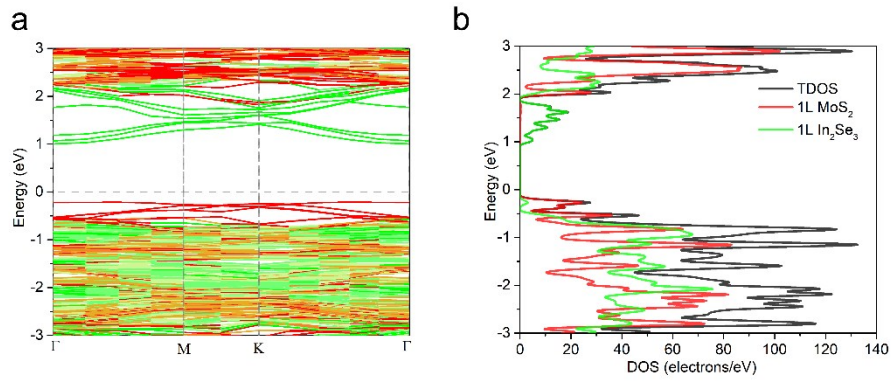

**Fig. S6** (a) Band structure and (b) density of states of the  $\text{In}_2\text{Se}_3/\text{MoS}_2$  heterostructure. The band structure and bandgap value of heterostructure change when compared with monolayer  $\text{MoS}_2$  and monolayer  $\text{In}_2\text{Se}_3$ . The conduction band minimum (CBM) is dominated by  $\text{In}_2\text{Se}_3$  and the valence band maximum (VBM) is mainly composed of  $\text{MoS}_2$ , revealing the weak interlayer coupling.

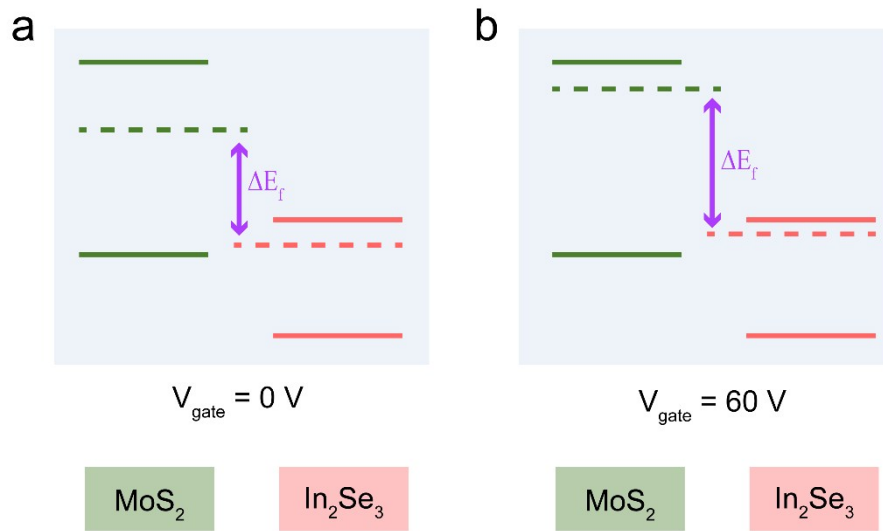

**Fig. S7** Band alignments of MoS<sub>2</sub> and In<sub>2</sub>Se<sub>3</sub> at gate voltage of (a) 0 V and (b) 60 V.



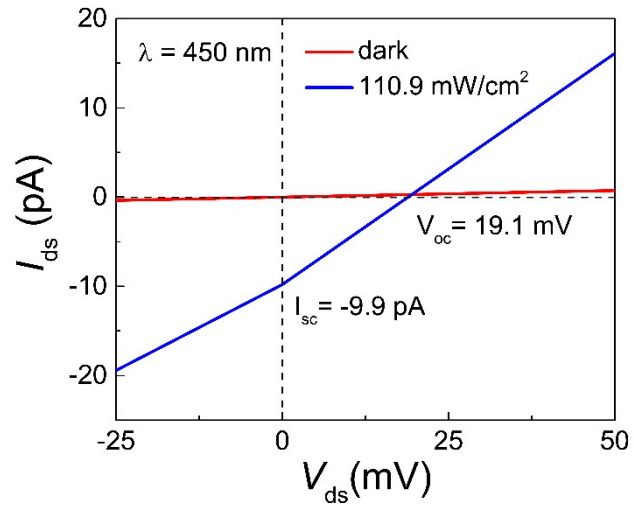

**Fig. S8** Photovoltaic effect of  $\text{In}_2\text{Se}_3/\text{MoS}_2$  heterostructures under 450 nm illumination at power density of 110.9 mW/cm<sup>2</sup>

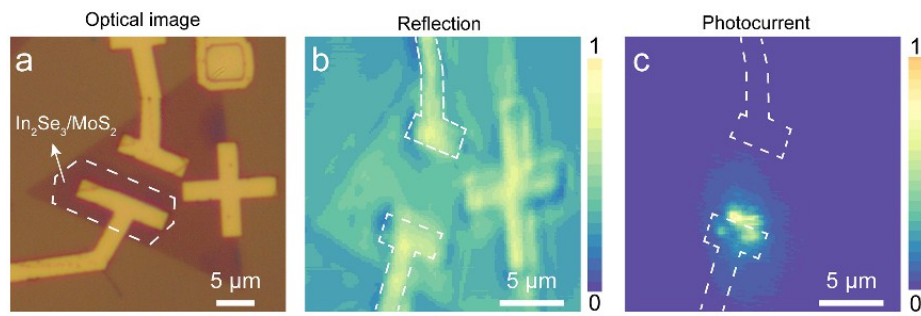

**Fig. S9** (a) Optical microscope image of the device. (b) Reflection image of the device (c) Photocurrent mapping of the device.

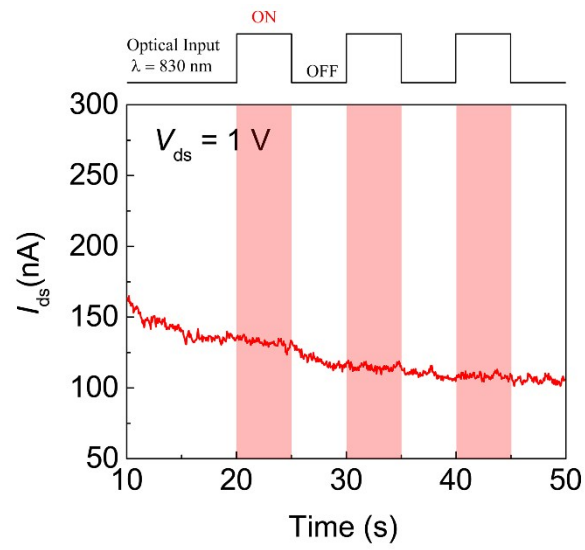

**Fig.S10** Time-resolved photoresponse of the device based on monolayer MoS<sub>2</sub> under 830 nm laser illumination with power density of 214.3 mW/cm<sup>2</sup>.

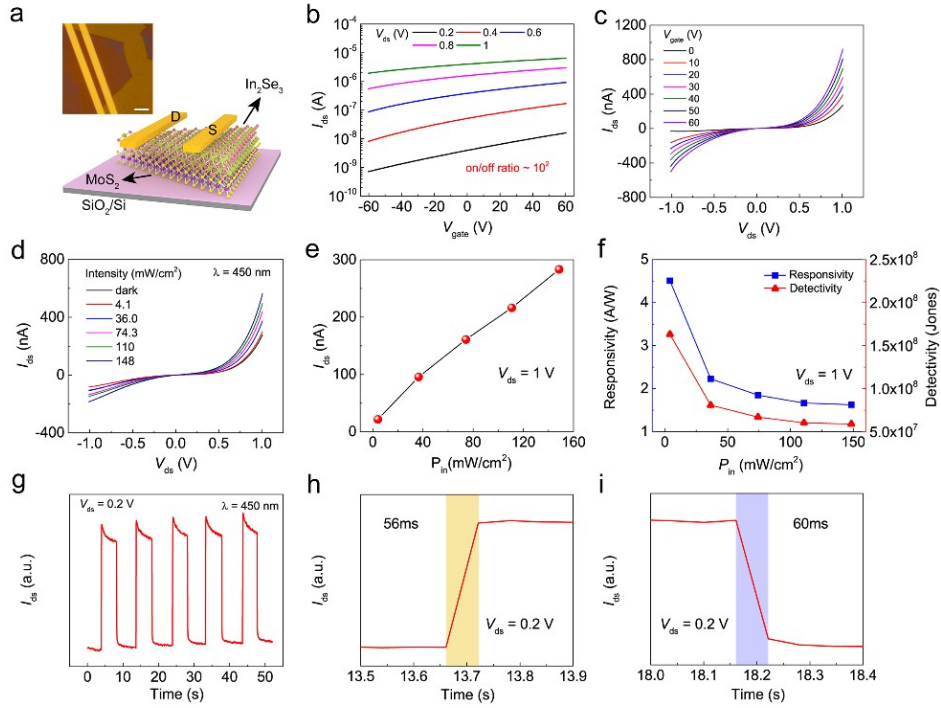

**Fig.S11** Electrical and photoelectronic properties of few layer  $\text{In}_2\text{Se}_3/\text{MoS}_2$  heterostructures. (a) Schematic illustration of the  $\text{In}_2\text{Se}_3/\text{MoS}_2$  vdWs heterostructure device on a  $\text{SiO}_2/\text{Si}$  substrate. Inset is an optical image of as-fabricated  $\text{In}_2\text{Se}_3/\text{MoS}_2$  heterostructure device. Scale bar, 5  $\mu\text{m}$ . (b) transfer curves with increasing bias voltages from 0.2 V to 1 V. (c)  $I_{\text{ds}}-V_{\text{ds}}$  curves at various back-gated voltages from 0 V to 60 V. (d)  $I_{\text{ds}}-V_{\text{ds}}$  curves in dark and under 450 nm illumination at different incident power densities. (e) Power dependent photocurrent curve at bias voltage of 1 V. (f) Power dependent responsivity and detectivity curves at bias voltage of 1 V. (g) Time-resolved photoresponse of the device under the laser turned on/off. (450 nm, 110  $\text{mW}/\text{cm}^2$ ,  $V_{\text{ds}} = 0.2$  V). (h,i) The rise and decay times of the photocurrent at bias voltage of 1 V.

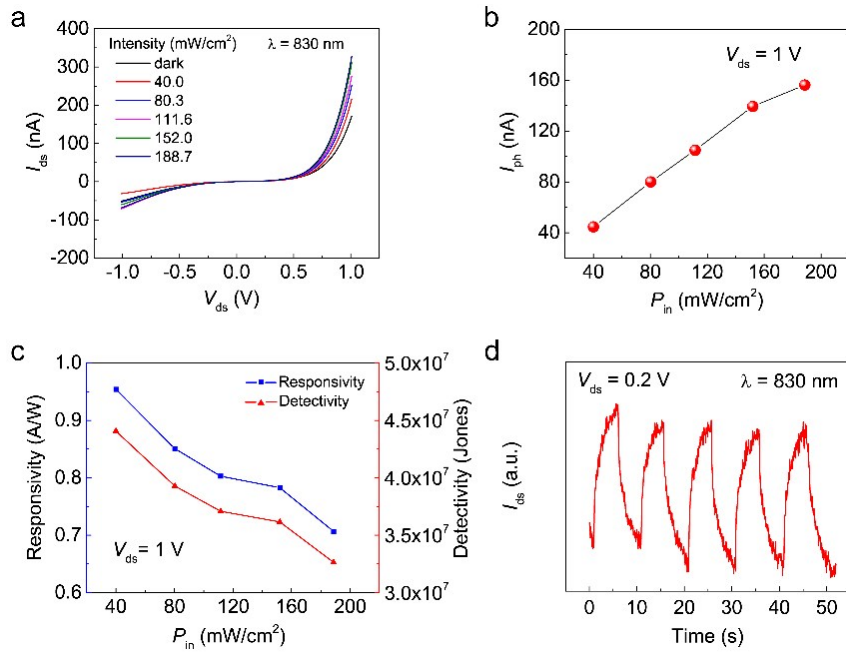

**Fig.S12** Photoresponse characterizations of few layer  $\text{In}_2\text{Se}_3/\text{MoS}_2$  heterostructures under 830 nm laser illumination. (a)  $I_{ds}$ - $V_{ds}$  curves of the photodetector measured in dark and under different power densities. (b) Photocurrent as a function of illumination power density at the bias voltage of 1 V. (c) Responsivity and detectivity as a function of illumination power density at the bias voltage of 1 V. (d) Time-resolved photoresponse of the device (830 nm, 188.7  $\text{mW}/\text{cm}^2$ ,  $V_{ds} = 1 \text{ V}$ ). (e,f) The rise and decay times of the photocurrent measured at  $V_{ds} = 0.2 \text{ V}$ .
